# Supplementary material
Source: PubMed Central journal article supplement (PMC3675839)
Supplement: Supp_Table1.pdf [file Supp_Table1.pdf]

SUPPLEMENTARY TABLE S1. PREGNANCY-RELATED INSURANCE CLAIMS CODES

---

Available online as a separate PDF.

Appendix A  
Pregnancy-Related Insurance Claims Codes

| Gestational Age (weeks) at Pregnancy Outcome†                      | Code  | Code Type | Description                                                                                                                             |
|--------------------------------------------------------------------|-------|-----------|-----------------------------------------------------------------------------------------------------------------------------------------|
| <b>CPT CODES (USUALLY RELATED TO OUTPATIENT PROFESSIONAL FEES)</b> |       |           |                                                                                                                                         |
| BLK                                                                | 59000 | cpt       | AMNIOCENTESIS; DIAGNOSTIC                                                                                                               |
| BLK                                                                | 59001 | cpt       | AMNIOCENTESIS; THERAPEUTIC AMNIOTIC FLUID REDUCTION (INCLUDES ULTRASOUND GUIDANCE)                                                      |
| BLK                                                                | 59012 | cpt       | CORDOCENTESIS (INTRAUTERINE), ANY METHOD                                                                                                |
| BLK                                                                | 59015 | cpt       | CHORIONIC VILLUS SAMPLING, ANY METHOD                                                                                                   |
| BLK                                                                | 59020 | cpt       | FETAL CONTRACTION STRESS TEST                                                                                                           |
| BLK                                                                | 59025 | cpt       | FETAL NON-STRESS TEST                                                                                                                   |
| BLK                                                                | 59030 | cpt       | FETAL SCALP BLOOD SAMPLING                                                                                                              |
| BLK                                                                | 59050 | cpt       | FETAL MONITORING DURING LABOR BY CONSULTING PHYSICIAN (IE, NON-ATTENDING PHYSICIAN) WITH WRITTEN REPORT; SUPERVISION AND INTERPRETATION |
| BLK                                                                | 59051 | cpt       | FETAL MONITORING DURING LABOR BY CONSULTING PHYSICIAN (IE, NON-ATTENDING PHYSICIAN) WITH WRITTEN REPORT; INTERPRETATION ONLY            |
| BLK                                                                | 59070 | cpt       | TRANSABDOMINAL AMNIOINFUSION, INCLUDING ULTRASOUND GUIDANCE                                                                             |
| BLK                                                                | 59072 | cpt       | FETAL UMBILICAL CORD OCCLUSION, INCLUDING ULTRASOUND GUIDANCE                                                                           |
| BLK                                                                | 59074 | cpt       | FETAL FLUID DRAINAGE (EG, VESICOCENTESIS, THORACOCENTESIS, PARACENTESIS), INCLUDING ULTRASOUND GUIDANCE                                 |
| BLK                                                                | 59076 | cpt       | FETAL SHUNT PLACEMENT, INCLUDING ULTRASOUND GUIDANCE                                                                                    |
| 8                                                                  | 59100 | cpt       | SURGICAL TREATMENT OF ECTOPIC PREGNANCY; TUBAL OR OVARIAN, REQUIRING SALPINGECTOMY AND/OR OOPHORECTOMY, ABDOMINAL OR VAGINAL APPROACH   |
| 8                                                                  | 59120 | cpt       | SURGICAL TREATMENT OF ECTOPIC PREGNANCY; TUBAL OR OVARIAN, WITHOUT SALPINGECTOMY AND/OR OOPHORECTOMY                                    |
| 8                                                                  | 59121 | cpt       | SURGICAL TREATMENT OF ECTOPIC PREGNANCY; ABDOMINAL PREGNANCY                                                                            |
| 8                                                                  | 59130 | cpt       | SURGICAL TREATMENT OF ECTOPIC PREGNANCY; INTERSTITIAL, UTERINE PREGNANCY REQUIRING TOTAL HYSTERECTOMY                                   |
| 8                                                                  | 59135 | cpt       | SURGICAL TREATMENT OF ECTOPIC PREGNANCY; INTERSTITIAL, UTERINE PREGNANCY WITH PARTIAL RESECTION OF UTERUS                               |
| 8                                                                  | 59136 | cpt       | SURGICAL TREATMENT OF ECTOPIC PREGNANCY; CERVICAL, WITH EVACUATION                                                                      |
| 8                                                                  | 59140 | cpt       | LAPAROSCOPIC TREATMENT OF ECTOPIC PREGNANCY; WITHOUT SALPINGECTOMY AND/OR OOPHORECTOMY                                                  |
| 8                                                                  | 59150 | cpt       | LAPAROSCOPIC TREATMENT OF ECTOPIC PREGNANCY; WITH SALPINGECTOMY AND/OR OOPHORECTOMY                                                     |
| BLK                                                                | 59151 | cpt       | ROUTINE OBSTETRIC CARE INCLUDING ANTEPARTUM CARE, VAGINAL DELIVERY (WITH OR WITHOUT EPISIOTOMY, AND/OR FORCEPS) AND POSTPARTUM CARE     |
| BLK                                                                | 59160 | cpt       | CURETTAGE, POSTPARTUM                                                                                                                   |
| EP                                                                 | 59300 | cpt       | EPISIOTOMY OR VAGINAL REPAIR, BY OTHER THAN ATTENDING PHYSICIAN                                                                         |
| BLK                                                                | 59320 | cpt       | CERCLAGE OF CERVIX, DURING PREGNANCY; VAGINAL                                                                                           |
| BLK                                                                | 59325 | cpt       | CERCLAGE OF CERVIX, DURING PREGNANCY; ABDOMINAL                                                                                         |
| EP                                                                 | 59350 | cpt       | HYSTERORRHAPHY OF RUPTURED UTERUS                                                                                                       |
| BLK                                                                | 59400 | cpt       | ROUTINE OBSTETRIC CARE INCLUDING ANTEPARTUM CARE, VAGINAL DELIVERY (WITH OR WITHOUT EPISIOTOMY, AND/OR FORCEPS) AND POSTPARTUM CARE     |
| EP                                                                 | 59409 | cpt       | VAGINAL DELIVERY ONLY (WITH OR WITHOUT EPISIOTOMY AND/OR FORCEPS);                                                                      |
| BLK                                                                | 59410 | cpt       | VAGINAL DELIVERY ONLY (WITH OR WITHOUT EPISIOTOMY AND/OR FORCEPS); INCLUDING POSTPARTUM CARE                                            |
| BLK                                                                | 59412 | cpt       | EXTERNAL CEPHALIC VERSION, WITH OR WITHOUT TOCOLYSIS (rotation of fetus)                                                                |
| EP                                                                 | 59414 | cpt       | DELIVERY OF PLACENTA (SEPARATE PROCEDURE)                                                                                               |
| BLK                                                                | 59425 | cpt       | ANTEPARTUM CARE ONLY; 4-6 VISITS                                                                                                        |

Appendix A  
Pregnancy-Related Insurance Claims Codes

| Gestational Age (weeks) at Pregnancy Outcome† | Code  | Code Type | Description                                                                                                                                                                                                                                            |
|-----------------------------------------------|-------|-----------|--------------------------------------------------------------------------------------------------------------------------------------------------------------------------------------------------------------------------------------------------------|
| BLK                                           | 59426 | cpt       | ANTEPARTUM CARE ONLY; 7 OR MORE VISITS                                                                                                                                                                                                                 |
| BLK                                           | 59430 | cpt       | POSTPARTUM CARE ONLY (SEPARATE PROCEDURE)                                                                                                                                                                                                              |
| BLK                                           | 59510 | cpt       | ROUTINE OBSTETRIC CARE INCLUDING ANTEPARTUM CARE, CESAREAN DELIVERY, AND POSTPARTUM CARE                                                                                                                                                               |
| EP                                            | 59514 | cpt       | CESAREAN DELIVERY ONLY;                                                                                                                                                                                                                                |
| BLK                                           | 59515 | cpt       | CESAREAN DELIVERY ONLY; INCLUDING POSTPARTUM CARE                                                                                                                                                                                                      |
| EP                                            | 59525 | cpt       | SUBTOTAL OR TOTAL HYSTERECTOMY AFTER CESAREAN DELIVERY (LIST SEPARATELY IN ADDITION TO CODE FOR PRIMARY PROCEDURE)                                                                                                                                     |
| BLK                                           | 59610 | cpt       | ROUTINE OBSTETRIC CARE INCLUDING ANTEPARTUM CARE, VAGINAL DELIVERY (WITH OR WITHOUT EPISIOTOMY, AND/OR FORCEPS) AND POSTPARTUM CARE, AFTER PREVIOUS CESAREAN DELIVERY                                                                                  |
| EP                                            | 59612 | cpt       | VAGINAL DELIVERY ONLY, AFTER PREVIOUS CESAREAN DELIVERY (WITH OR WITHOUT EPISIOTOMY AND/OR FORCEPS);                                                                                                                                                   |
| BLK                                           | 59614 | cpt       | VAGINAL DELIVERY ONLY, AFTER PREVIOUS CESAREAN DELIVERY (WITH OR WITHOUT EPISIOTOMY AND/OR FORCEPS); INCLUDING POSTPARTUM CARE                                                                                                                         |
| BLK                                           | 59618 | cpt       | ROUTINE OBSTETRIC CARE INCLUDING ANTEPARTUM CARE, CESAREAN DELIVERY, AND POSTPARTUM CARE, FOLLOWING ATTEMPTED VAGINAL DELIVERY AFTER PREVIOUS CESAREAN DELIVERY                                                                                        |
| EP                                            | 59620 | cpt       | CESAREAN DELIVERY ONLY, FOLLOWING ATTEMPTED VAGINAL DELIVERY AFTER PREVIOUS CESAREAN DELIVERY;                                                                                                                                                         |
| BLK                                           | 59622 | cpt       | CESAREAN DELIVERY ONLY, FOLLOWING ATTEMPTED VAGINAL DELIVERY AFTER PREVIOUS CESAREAN DELIVERY; INCLUDING POSTPARTUM CARE                                                                                                                               |
| 15                                            | 59812 | cpt       | TREATMENT OF INCOMPLETE ABORTION, ANY TRIMESTER, COMPLETED SURGICALLY                                                                                                                                                                                  |
| 10                                            | 59820 | cpt       | TREATMENT OF MISSED ABORTION, COMPLETED SURGICALLY; FIRST TRIMESTER                                                                                                                                                                                    |
| 20                                            | 59821 | cpt       | TREATMENT OF MISSED ABORTION, COMPLETED SURGICALLY; SECOND TRIMESTER                                                                                                                                                                                   |
| 15                                            | 59830 | cpt       | TREATMENT OF SEPTIC ABORTION, COMPLETED SURGICALLY                                                                                                                                                                                                     |
| 10                                            | 59840 | cpt       | INDUCED ABORTION, BY DILATION AND CURETTAGE                                                                                                                                                                                                            |
| 10                                            | 59841 | cpt       | INDUCED ABORTION, BY DILATION AND EVACUATION                                                                                                                                                                                                           |
| 10                                            | 59850 | cpt       | INDUCED ABORTION, BY ONE OR MORE INTRA-AMNIOTIC INJECTIONS (AMNIOCENTESIS-INJECTIONS), INCLUDING HOSPITAL ADMISSION AND VISITS, DELIVERY OF FETUS AND SECUNDINES;                                                                                      |
| 10                                            | 59851 | cpt       | INDUCED ABORTION, BY ONE OR MORE INTRA-AMNIOTIC INJECTIONS (AMNIOCENTESIS-INJECTIONS), INCLUDING HOSPITAL ADMISSION AND VISITS, DELIVERY OF FETUS AND SECUNDINES; WITH DILATION AND CURETTAGE AND/OR EVACUATION                                        |
| 10                                            | 59852 | cpt       | INDUCED ABORTION, BY ONE OR MORE INTRA-AMNIOTIC INJECTIONS (AMNIOCENTESIS-INJECTIONS), INCLUDING HOSPITAL ADMISSION AND VISITS, DELIVERY OF FETUS AND SECUNDINES; WITH HYSTEROTOMY (FAILED INTRA-AMNIOTIC INJECTION)                                   |
| 10                                            | 59855 | cpt       | INDUCED ABORTION, BY ONE OR MORE VAGINAL SUPPOSITORIES (EG, PROSTAGLANDIN) WITH OR WITHOUT CERVICAL DILATION (EG, LAMINARIA), INCLUDING HOSPITAL ADMISSION AND VISITS, DELIVERY OF FETUS AND SECUNDINES                                                |
| 10                                            | 59856 | cpt       | INDUCED ABORTION, BY ONE OR MORE VAGINAL SUPPOSITORIES (EG, PROSTAGLANDIN) WITH OR WITHOUT CERVICAL DILATION (EG, LAMINARIA), INCLUDING HOSPITAL ADMISSION AND VISITS, DELIVERY OF FETUS AND SECUNIDINE WITH DILATION AND CURETTAGE AND/OR EVACUATION  |
| 10                                            | 59857 | cpt       | INDUCED ABORTION, BY ONE OR MORE VAGINAL SUPPOSITORIES (EG, PROSTAGLANDIN) WITH OR WITHOUT CERVICAL DILATION (EG, LAMINARIA), INCLUDING HOSPITAL ADMISSION AND VISITS, DELIVERY OF FETUS AND SECUNDINES; WITH HYSTEROTOMY (FAILED MEDICAL EVACUATION). |
| BLK                                           | 59866 | cpt       | MULTIFETAL PREGNANCY REDUCTION(S) (MPR)                                                                                                                                                                                                                |
| 8                                             | 59870 | cpt       | UTERINE EVACUATION AND CURETTAGE FOR HYDATIDIFORM MOLE                                                                                                                                                                                                 |
| BLK                                           | 59871 | cpt       | REMOVAL OF CERCLAGE SUTURE UNDER ANESTHESIA (OTHER THAN LOCAL)                                                                                                                                                                                         |

Appendix A  
Pregnancy-Related Insurance Claims Codes

| Gestational Age (weeks) at Pregnancy Outcome†                                                                                                                  | Code           | Code Type | Description                                                                                                                                                                                                                                                                                   |
|----------------------------------------------------------------------------------------------------------------------------------------------------------------|----------------|-----------|-----------------------------------------------------------------------------------------------------------------------------------------------------------------------------------------------------------------------------------------------------------------------------------------------|
| BLK                                                                                                                                                            | 59897          | cpt       | UNLISTED FETAL INVASIVE PROCEDURE, INCLUDING ULTRASOUND GUIDANCE                                                                                                                                                                                                                              |
| BLK                                                                                                                                                            | 59898          | cpt       | UNLISTED LAPAROSCOPY PROCEDURE, MATERNITY CARE AND DELIVERY                                                                                                                                                                                                                                   |
| BLK                                                                                                                                                            | 59899          | cpt       | UNLISTED PROCEDURE, MATERNITY CARE AND DELIVERY                                                                                                                                                                                                                                               |
| <b>HCPC Codes</b>                                                                                                                                              |                |           |                                                                                                                                                                                                                                                                                               |
| 10                                                                                                                                                             | S0199          | hcpc      | MEDICALLY INDUCED ABORTION BY ORAL INGESTION OF MEDICATION INCLUDING ALL ASSOCIATED SERVICES AND SUPPLIES (E.G., PATIENT COUNSELING, OFFICE VISITS, CONFIRMATION OF PREGNANCY BY HCG, ULTRASOUND TO CONFIRM DURATION OF PREGNANCY, ULTRASOUND TO CONFIRM COMPLETION OF ABORTION) EXCEPT DRUGS |
| 20                                                                                                                                                             | S2260          | hcpc      | INDUCED ABORTION, 17 TO 24 WEEKS                                                                                                                                                                                                                                                              |
| 28                                                                                                                                                             | S2262          | hcpc      | ABORTION FOR MATERNAL INDICATION, 25 WEEKS OR GREATER                                                                                                                                                                                                                                         |
| 26                                                                                                                                                             | S2265          | hcpc      | INDUCED ABORTION, 25 TO 28 WEEKS                                                                                                                                                                                                                                                              |
| 30                                                                                                                                                             | S2266          | hcpc      | INDUCED ABORTION, 29 TO 31 WEEKS                                                                                                                                                                                                                                                              |
| 33                                                                                                                                                             | S2267          | hcpc      | INDUCED ABORTION, 32 WEEKS OR GREATER                                                                                                                                                                                                                                                         |
| BLK                                                                                                                                                            | S8055          | hcpc      | ULTRASOUND GUIDANCE FOR MULTIFETAL PREGNANCY REDUCTION(S), TECHNICAL COMPONENT (ONLY TO BE USED WHEN THE PHYSICIAN DOING THE REDUCTION PROCEDURE DOES NOT PERFORM THE ULTRASOUND)                                                                                                             |
| <b>ICD-9 Procedure Codes (Usually inpatient procedures)</b>                                                                                                    |                |           |                                                                                                                                                                                                                                                                                               |
| 8                                                                                                                                                              | 66.62          | icd9proc  | SALPINGECTOMY WITH REMOVAL OF TUBAL PREGNANCY                                                                                                                                                                                                                                                 |
| PT                                                                                                                                                             | 69.01          | icd9proc  | DILATION AND CURETTAGE FOR TERMINATION OF PREGNANCY                                                                                                                                                                                                                                           |
| EP                                                                                                                                                             | 69.02          | icd9proc  | DILATION AND CURETTAGE FOLLOWING DELIVERY OR ABORTION                                                                                                                                                                                                                                         |
| PT                                                                                                                                                             | 69.51          | icd9proc  | ASPIRATION CURETTAGE OF UTERUS FOR TERMINATION OF PREGNANCY                                                                                                                                                                                                                                   |
| EP                                                                                                                                                             | 69.52          | icd9proc  | ASPIRATION CURETTAGE FOLLOWING DELIVERY OR ABORTION                                                                                                                                                                                                                                           |
|                                                                                                                                                                | <b>72 - 75</b> | icd9proc  | OBSTETRICAL PROCEDURES                                                                                                                                                                                                                                                                        |
| Note: The following codes show the details for ICD-9-Procedure codes 72 - 75. Women with ICD-9-Procedures codes beginning with 72.xx-75.xx should be included. |                |           |                                                                                                                                                                                                                                                                                               |
| EP                                                                                                                                                             | 72.00          | icd9proc  | FORCEPS, VACUUM, AND BREECH DELIVERY                                                                                                                                                                                                                                                          |
| EP                                                                                                                                                             | 72.10          | icd9proc  | LOW FORCEPS OPERATION WITH EPISIOTOMY                                                                                                                                                                                                                                                         |
| EP                                                                                                                                                             | 72.20          | icd9proc  | MID FORCEPS OPERATION                                                                                                                                                                                                                                                                         |
| EP                                                                                                                                                             | 72.21          | icd9proc  | MID FORCEPS OPERATION WITH EPISIOTOMY                                                                                                                                                                                                                                                         |
| EP                                                                                                                                                             | 72.29          | icd9proc  | OTHER MID FORCEPS OPERATION                                                                                                                                                                                                                                                                   |
| EP                                                                                                                                                             | 72.30          | icd9proc  | HIGH FORCEPS OPERATION                                                                                                                                                                                                                                                                        |
| EP                                                                                                                                                             | 72.31          | icd9proc  | HIGH FORCEPS OPERATION WITH EPISIOTOMY                                                                                                                                                                                                                                                        |
| EP                                                                                                                                                             | 72.39          | icd9proc  | OTHER HIGH FORCEPS OPERATION                                                                                                                                                                                                                                                                  |
| EP                                                                                                                                                             | 72.40          | icd9proc  | FORCEPS ROTATION OF FETAL HEAD                                                                                                                                                                                                                                                                |
| EP                                                                                                                                                             | 72.50          | icd9proc  | BREECH EXTRACTION                                                                                                                                                                                                                                                                             |
| EP                                                                                                                                                             | 72.51          | icd9proc  | PARTIAL BREECH EXTRACTION WITH FORCEPS TO AFTER COMING HEAD                                                                                                                                                                                                                                   |
| EP                                                                                                                                                             | 72.52          | icd9proc  | OTHER PARTIAL BREECH EXTRACTION                                                                                                                                                                                                                                                               |
| EP                                                                                                                                                             | 72.53          | icd9proc  | TOTAL BREECH EXTRACTION WITH FORCEPS TO AFTER COMING HEAD                                                                                                                                                                                                                                     |
| EP                                                                                                                                                             | 72.54          | icd9proc  | OTHER TOTAL BREECH EXTRACTION                                                                                                                                                                                                                                                                 |
| EP                                                                                                                                                             | 72.60          | icd9proc  | FORCEPS APPLICATION TO AFTERCOMING HEAD                                                                                                                                                                                                                                                       |
| EP                                                                                                                                                             | 72.70          | icd9proc  | VACUUM EXTRACTION                                                                                                                                                                                                                                                                             |
| EP                                                                                                                                                             | 72.71          | icd9proc  | VACUUM EXTRACTION WITH EPISIOTOMY                                                                                                                                                                                                                                                             |
| EP                                                                                                                                                             | 72.79          | icd9proc  | OTHER VACUUM EXTRACTION                                                                                                                                                                                                                                                                       |

Appendix A  
Pregnancy-Related Insurance Claims Codes

| Gestational Age (weeks) at Pregnancy Outcome† | Code  | Code Type | Description                                           |
|-----------------------------------------------|-------|-----------|-------------------------------------------------------|
| EP                                            | 72.80 | icd9proc  | OTHER SPECIFIED INSTRUMENTAL DELIVERY                 |
| EP                                            | 72.90 | icd9proc  | UNSPECIFIED INSTRUMENTAL DELIVERY                     |
| EP                                            | 73.00 | icd9proc  | OTHER PROCEDURES INDUCING OR ASSISTING DELIVERY       |
| EP                                            | 73.01 | icd9proc  | INDUCTION OF LABOR BY ARTIFICIAL RUPTURE OF MEMBRANES |
| EP                                            | 73.09 | icd9proc  | OTHER ARTIFICIAL RUPTURE OF MEMBRANES                 |
| EP                                            | 73.10 | icd9proc  | OTHER SURGICAL INDUCTION OF LABOR                     |
| EP                                            | 73.20 | icd9proc  | INTERNAL AND COMBINED VERSION AND EXTRACTION          |
| EP                                            | 73.21 | icd9proc  | INTERNAL AND COMBINED VERSION WITHOUT EXTRACTION      |
| EP                                            | 73.22 | icd9proc  | INTERNAL AND COMBINED VERSION WITH EXTRACTION         |
| EP                                            | 73.30 | icd9proc  | FAILED FORCEPS                                        |
| EP                                            | 73.40 | icd9proc  | MEDICAL INDUCTION OF LABOR                            |
| EP                                            | 73.50 | icd9proc  | MANUALLY ASSISTED DELIVERY                            |
| EP                                            | 73.51 | icd9proc  | MANUAL ROTATION OF FETAL HEAD                         |
| EP                                            | 73.59 | icd9proc  | OTHER MANUALLY ASSISTED DELIVERY                      |
| EP                                            | 73.60 | icd9proc  | EPISIOTOMY                                            |
| EP                                            | 73.80 | icd9proc  | OPERATIONS ON FETUS TO FACILITATE DEIVERY             |
| EP                                            | 73.90 | icd9proc  | OTHER OPERATIONS ASSISTING DELIVERY                   |
| EP                                            | 73.91 | icd9proc  | EXTERNAL VERSION                                      |
| EP                                            | 73.92 | icd9proc  | REPLACEMENT OF PROLAPSED UMBILICAL CORD               |
| EP                                            | 73.93 | icd9proc  | INCISION OF CERVIX TO ASSIST DELIVERY                 |
| EP                                            | 73.94 | icd9proc  | PUBIOTOMY TO ASSIST DELIVERY                          |
| BLK                                           | 73.99 | icd9proc  | OTHER PROCEDURES INDUCING OR ASSISTING DELIVERY       |
| EP                                            | 74.00 | icd9proc  | CLASSICAL CESAREAN SECTION, TRANSPERITONEAL           |
| EP                                            | 74.10 | icd9proc  | LOW CERVICAL CESAREAN SECTION, LOWER UTERINE SEGMENT  |
| EP                                            | 74.20 | icd9proc  | EXTRAPERITONEAL CESAREAN SECTION, SUPRAVESICAL        |
| 8                                             | 74.30 | icd9proc  | REMOVAL OF EXTRATUBAL ECTOPIC PREGNANCY               |
| EP                                            | 74.40 | icd9proc  | CESAREAN SECTION OF OTHER SPECIFIED TYPE              |
| EP                                            | 74.90 | icd9proc  | CESAREAN SECTION OF UNSPECIFIED TYPE                  |
| 8                                             | 74.91 | icd9proc  | HYSTEROTOMY TO TERMINATE PREGNANCY                    |
| EP                                            | 74.99 | icd9proc  | OTHER CESAREAN SECTION OF UNSPECIFIED TYPE            |
| 10                                            | 75.00 | icd9proc  | INTRA-AMNIOTIC INJECTION FOR ABORTION                 |
| BLK                                           | 75.10 | icd9proc  | DIAGNOSTIC AMNIOCENTESIS                              |
| BLK                                           | 75.20 | icd9proc  | INTRAUTERINE TRANSFUSION                              |
| BLK                                           | 75.30 | icd9proc  | OTHER INTRAUTERINE OPERATIONS ON FETUS AND AMNION     |
| BLK                                           | 75.31 | icd9proc  | AMNIOSCOPY                                            |
| BLK                                           | 75.32 | icd9proc  | FETAL EKG (SCALP)                                     |
| BLK                                           | 75.33 | icd9proc  | FETAL BLOOD SAMPLING AND BIOPSY                       |
| BLK                                           | 75.34 | icd9proc  | OTHER FETAL MONITORING                                |
| BLK                                           | 75.35 | icd9proc  | OTHER DIAGNOSTIC PROCEDURES ON FETUS AND AMNION       |
| BLK                                           | 75.36 | icd9proc  | CORRECTION OF FETAL DEFECT                            |
| BLK                                           | 75.37 | icd9proc  | AMNIOINFUSION                                         |
| BLK                                           | 75.38 | icd9proc  | FETAL PULSE OXIMETRY                                  |

Appendix A  
Pregnancy-Related Insurance Claims Codes

| Gestational Age<br>(weeks) at<br>Pregnancy<br>Outcome†                                                                                            | Code             | Code Type | Description                                                                                  |
|---------------------------------------------------------------------------------------------------------------------------------------------------|------------------|-----------|----------------------------------------------------------------------------------------------|
| EP                                                                                                                                                | 75.40            | icd9proc  | MANUAL REMOVAL OF RETAINED PLACENTA                                                          |
| EP                                                                                                                                                | 75.50            | icd9proc  | REPAIR OF CURRENT OBSTETRIC LACERATION OF UTERUS, NOT OTHERWISE SPECIFIED                    |
| EP                                                                                                                                                | 75.51            | icd9proc  | REPAIR OF CURRENT OBSTETRIC LACERATION OF CERVIX                                             |
| EP                                                                                                                                                | 75.52            | icd9proc  | REPAIR OF CURRENT OBSTETRIC LACERATION OF CORPUS UTERI                                       |
| EP                                                                                                                                                | 75.61            | icd9proc  | REPAIR OF CURRENT OBSTETRIC LACERATION OF BLADDER AND URETHRA                                |
| EP                                                                                                                                                | 75.62            | icd9proc  | REPAIR OF CURRENT OBSTETRIC LACERATION OF RECTUM AND SPHINCTER ANI                           |
| EP                                                                                                                                                | 75.69            | icd9proc  | REPAIR OF OTHER CURRENT OBSTETRIC LACERATION                                                 |
| EP                                                                                                                                                | 75.70            | icd9proc  | MANUAL EXPLORATION OF UTERINE CAVITY, POSTPARTUM                                             |
| BLK                                                                                                                                               | 75.80            | icd9proc  | OBSTETRIC TAMPONADE OF UTERUS OR VAGINA                                                      |
| BLK                                                                                                                                               | 75.90            | icd9proc  | OTHER OBSTETRIC OPERATIONS                                                                   |
| BLK                                                                                                                                               | 75.91            | icd9proc  | EVACUATION OF OBSTETRICAL INCISIONAL HEMATOMA OF PERINEUM                                    |
| BLK                                                                                                                                               | 75.92            | icd9proc  | EVACUATION OF OTHER HEMATOMA OF VULVA OR VAGINA                                              |
| BLK                                                                                                                                               | 75.93            | icd9proc  | SURGICAL CORRECTION OF INVERTED UTERUS                                                       |
| BLK                                                                                                                                               | 75.94            | icd9proc  | MANUAL REPLACEMENT OF INVERTED UTERUS                                                        |
| BLK                                                                                                                                               | 75.99            | icd9proc  | OTHER OBSTETRIC OPERATIONS                                                                   |
| <b>ICD-9-CM (Diagnosis) Codes</b>                                                                                                                 |                  |           |                                                                                              |
| BLK                                                                                                                                               | V22              | icd9cm    | NORMAL PREGNANCY                                                                             |
| BLK                                                                                                                                               | V23              | icd9cm    | SUPERVISION OF HIGH-RISK PREGNANCY                                                           |
| EP                                                                                                                                                | V27              | icd9cm    | OUTCOME OF DELIVERY (IN MOTHER'S RECORD)                                                     |
| EP                                                                                                                                                | V270             | icd9cm    | MOTHER WITH SINGLE LIVE BORN                                                                 |
| EP                                                                                                                                                | V271             | icd9cm    | MOTHER WITH SINGLE STILLBORN                                                                 |
| EP                                                                                                                                                | V272             | icd9cm    | MOTHER WITH TWINS BOTH LIVE BORN                                                             |
| EP                                                                                                                                                | V273             | icd9cm    | MOTHER WITH TWINS ONE LIVE BORN AND ONE STILLBORN                                            |
| EP                                                                                                                                                | V274             | icd9cm    | MOTHER WITH TWINS BOTH STILL BORN                                                            |
| EP                                                                                                                                                | V275             | icd9cm    | MOTHER WITH OTHER MULTIPLE BIRTH ALL LIVE BORN                                               |
| EP                                                                                                                                                | V276             | icd9cm    | MOTHER WITH OTHER MULTIPLE BIRTH SOME LIVE BORN                                              |
| EP                                                                                                                                                | V277             | icd9cm    | MOTHER WITH OTHER MULTIPLE BIRTH ALL STILLBORN                                               |
| EP                                                                                                                                                | V279             | icd9cm    | MOTHER WITH UNSPECIFIED OUTCOME OF DELIVERY                                                  |
| BLK                                                                                                                                               | V28              | icd9cm    | ENCOUNTER FOR ANTENATAL SCREENING OF MOTHER                                                  |
| BLK                                                                                                                                               | <b>630 - 679</b> | icd9cm    | COMPLICATIONS OF PREGNANCY, CHILDBIRTH, AND THE PUERPERIUM (630-679)                         |
| Note: The following codes show the details for ICD-9-CM codes 630-679. Women with ICD-9-CM codes beginning with 630.xx-679.xx should be included. |                  |           |                                                                                              |
| 8                                                                                                                                                 | 630              | icd9cm    | HYDATIDIFORM MOLE (Trophoblastic mole)                                                       |
| BLK                                                                                                                                               | 631              | icd9cm    | OTHER ABNORMAL PRODUCT OF CONCEPTION                                                         |
| 20                                                                                                                                                | 632              | icd9cm    | MISSED ABORTION (Early fetal death before completion of 22 wks with retention of dead fetus) |
| 8                                                                                                                                                 | 633              | icd9cm    | ECTOPIC PREGNANCY                                                                            |
| 8                                                                                                                                                 | 634              | icd9cm    | SPONTANEOUS ABORTION                                                                         |
| 10                                                                                                                                                | 635              | icd9cm    | LEGALLY INDUCED ABORTION                                                                     |
| 10                                                                                                                                                | 636              | icd9cm    | ILLEGALLY INDUCED ABORTION                                                                   |
| 10                                                                                                                                                | 637              | icd9cm    | LEGALLY UNSPECIFIED ABORTION                                                                 |
| 8                                                                                                                                                 | 638              | icd9cm    | FAILED ATTEMPTED ABORTION                                                                    |

Appendix A  
Pregnancy-Related Insurance Claims Codes

| Gestational Age (weeks) at Pregnancy Outcome† | Code | Code Type | Description                                                                                                                         |
|-----------------------------------------------|------|-----------|-------------------------------------------------------------------------------------------------------------------------------------|
| BLK                                           | 639  | icd9cm    | COMPLICATIONS FOLLOWING ABORTION OR ECTOPIC AND MOLAR PREGNANCIES                                                                   |
| BLK                                           | 640  | icd9cm    | HEMORRHAGE IN EARLY PREGNANCY                                                                                                       |
| BLK                                           | 641  | icd9cm    | ANTEPARTUM HEMORRHAGE, ABRUPTIO PLACENTAE, AND PLACENTA PREVIA                                                                      |
| BLK                                           | 642  | icd9cm    | HYPERTENSION COMPLICATING PREGNANCY, CHILDBIRTH, AND THE PUERPERIUM                                                                 |
| BLK                                           | 643  | icd9cm    | EXCESSIVE VOMITING IN PREGNANCY                                                                                                     |
| BLK                                           | 644  | icd9cm    | EARLY OR THREATENED LABOR (without delivery)                                                                                        |
| BLK                                           | 645  | icd9cm    | LATE PREGNANCY                                                                                                                      |
| BLK                                           | 646  | icd9cm    | OTHER COMPLICATIONS OF PREGNANCY, NOT ELSEWHERE CLASSIFIED                                                                          |
| BLK                                           | 647  | icd9cm    | INFECTIOUS AND PARASITIC CONDITIONS IN THE MOTHER CLASSIFIABLE ELSEWHERE, BUT COMPLICATING PREGNANCY, CHILDBIRTH, OR THE PUERPERIUM |
| BLK                                           | 648  | icd9cm    | OTHER CURRENT CONDITIONS IN THE MOTHER CLASSIFIABLE ELSEWHERE, BUT COMPLICATING PREGNANCY, CHILDBIRTH, OR THE PUERPERIUM            |
| BLK                                           | 649  | icd9cm    | OTHER CONDITIONS OR STATUS OF THE MOTHER COMPLICATING PREGNANCY, CHILDBIRTH, OR PUERPERIUM                                          |
| 40                                            | 650  | icd9cm    | NORMAL DELIVERY                                                                                                                     |
| BLK                                           | 651  | icd9cm    | MULTIPLE GESTATION                                                                                                                  |
| BLK                                           | 652  | icd9cm    | MALPOSITION AND MALPRESENTATION OF FETUS                                                                                            |
| BLK                                           | 653  | icd9cm    | DISPROPORTION IN PREGNANCY, LABOR, AND DELIVERY                                                                                     |
| BLK                                           | 654  | icd9cm    | ABNORMALITY OF ORGANS AND SOFT TISSUES OF PELVIS COMPLICATING PREGNANCY, CHILDBIRTH, OR THE PUERPERIUM                              |
| BLK                                           | 655  | icd9cm    | KNOWN OR SUSPECTED FETAL ABNORMALITY AFFECTING MANAGEMENT OF MOTHER                                                                 |
| BLK                                           | 656  | icd9cm    | OTHER KNOWN OR SUSPECTED FETAL AND PLACENTAL PROBLEMS AFFECTING MANAGEMENT OF MOTHER                                                |
| BLK                                           | 657  | icd9cm    | POLYHYDRAMNIOS                                                                                                                      |
| BLK                                           | 658  | icd9cm    | OTHER PROBLEMS ASSOCIATED WITH AMNIOTIC CAVITY AND MEMBRANES                                                                        |
| BLK                                           | 659  | icd9cm    | OTHER INDICATIONS FOR CARE OR INTERVENTION RELATED TO LABOR AND DELIVERY, NOT ELSEWHERE CLASSIFIED                                  |
| BLK                                           | 660  | icd9cm    | OBSTRUCTED LABOR                                                                                                                    |
| BLK                                           | 661  | icd9cm    | ABNORMALITY OF FORCES OF LABOR                                                                                                      |
| BLK                                           | 662  | icd9cm    | LONG LABOR                                                                                                                          |
| BLK                                           | 663  | icd9cm    | UMBILICAL CORD COMPLICATIONS DURING LABOR AND DELIVERY                                                                              |
| EP                                            | 664  | icd9cm    | TRAUMA TO PERINEUM AND VULVA DURING DELIVERY                                                                                        |
| BLK                                           | 665  | icd9cm    | OTHER OBSTETRICAL TRAUMA                                                                                                            |
| BLK                                           | 666  | icd9cm    | POSTPARTUM HEMORRHAGE                                                                                                               |
| BLK                                           | 667  | icd9cm    | RETAINED PLACENTA OR MEMBRANES, WITHOUT HEMORRHAGE                                                                                  |
| EP                                            | 668  | icd9cm    | COMPLICATIONS OF THE ADMINISTRATION OF ANESTHETIC OR OTHER SEDATION IN LABOR AND DELIVERY                                           |
| EP                                            | 669  | icd9cm    | OTHER COMPLICATIONS OF LABOR AND DELIVERY, NOT ELSEWHERE CLASSIFIED                                                                 |
| BLK                                           | 670  | icd9cm    | MAJOR PUERPERAL INFECTION                                                                                                           |
| BLK                                           | 671  | icd9cm    | VENOUS COMPLICATIONS IN PREGNANCY AND THE PUERPERIUM                                                                                |
| BLK                                           | 672  | icd9cm    | PYREXIA OF UNKNOWN ORIGIN DURING THE PUERPERIUM                                                                                     |
| BLK                                           | 673  | icd9cm    | OBSTETRICAL PULMONARY EMBOLISM                                                                                                      |
| BLK                                           | 674  | icd9cm    | OTHER AND UNSPECIFIED COMPLICATIONS OF THE PUERPERIUM, NOT ELSEWHERE CLASSIFIED                                                     |
| BLK                                           | 675  | icd9cm    | INFECTIONS OF THE BREAST AND NIPPLE ASSOCIATED WITH CHILDBIRTH                                                                      |
| BLK                                           | 676  | icd9cm    | OTHER DISORDERS OF THE BREAST ASSOCIATED WITH CHILDBIRTH AND DISORDERS OF LACTATION                                                 |
| BLK                                           | 677  | icd9cm    | LATE EFFECT OF COMPLICATION OF PREGNANCY, CHILDBIRTH, AND THE PUERPERIUM                                                            |

Appendix A  
Pregnancy-Related Insurance Claims Codes

| Gestational Age (weeks) at Pregnancy Outcome†                                     | Code       | Code Type | Description                                                                                   |             |
|-----------------------------------------------------------------------------------|------------|-----------|-----------------------------------------------------------------------------------------------|-------------|
| BLK                                                                               | 678        | icd9cm    | OTHER FETAL CONDITIONS                                                                        |             |
| BLK                                                                               | 679        | icd9cm    | COMPLICATIONS OF IN UTERO PROCEDURES                                                          |             |
| <b>Diagnosis-related Groups (DRG) Codes Version 24</b>                            |            |           |                                                                                               | X Ref v25   |
| EP                                                                                | 370        | DRG       | CESAREAN SECTION WITH COMPLICATIONS, COMORBIDITIES                                            | 765         |
| EP                                                                                | 371        | DRG       | CESAREAN SECTION WITHOUT COMPLICATIONS, COMORBIDITIES                                         | 766         |
| EP                                                                                | 372        | DRG       | VAGINAL DELIVERY WITH COMPLICATING DIAGNOSES                                                  | 774         |
| EP                                                                                | 373        | DRG       | VAGINAL DELIVERY WITHOUT COMPLICATING DIAGNOSES                                               | 775         |
| EP                                                                                | 374        | DRG       | VAGINAL DELIVERY WITH STERILIZATION &/OR DILATION & CURETTAGE                                 | 767         |
| EP                                                                                | 375        | DRG       | VAGINAL DELIVERY WITH OPERATING ROOM PROCEDURE EXCEPT STERILIZATION &/OR DILATION & CURETTAGE | 768         |
| BLK                                                                               | 376        | DRG       | POSTPARTUM & POST ABORTION DIAGNOSES WITHOUT OPERATING ROOM PROCEDURE                         | 776         |
| BLK                                                                               | 377        | DRG       | POSTPARTUM & POST ABORTION DIAGNOSES WITH OPERATING ROOM PROCEDURE                            | 769         |
| 8                                                                                 | 378        | DRG       | ECTOPIC PREGNANCY                                                                             | 777         |
| BLK                                                                               | 379        | DRG       | THREATENED ABORTION                                                                           | 778         |
| 8                                                                                 | 380        | DRG       | ABORTION WITHOUT DILATION & CURETTAGE                                                         | 779         |
| 8                                                                                 | 381        | DRG       | ABORTION WITH DILATION & CURETTAGE, ASPIRATION CURETTAGE OR HYSTEROTOMY                       | 770         |
| BLK                                                                               | 382        | DRG       | FALSE LABOR                                                                                   | 780         |
| BLK                                                                               | 383        | DRG       | OTHER ANTEPARTUM DIAGNOSES WITH MEDICAL COMPLICATIONS                                         | 781         |
| BLK                                                                               | 384        | DRG       | OTHER ANTEPARTUM DIAGNOSES WITHOUT MEDICAL COMPLICATIONS                                      | 782         |
| BLK                                                                               | 385        | DRG       | NEONATES, DIED OR TRANSFERRED TO ANOTHER ACUTE CARE FACILITY                                  | 789         |
| 32                                                                                | 386        | DRG       | EXTREME IMMATURETY OR RESPIRATORY DISTRESS SYNDROME, NEONATE                                  | 790         |
| 34                                                                                | 387        | DRG       | PREMATURITY WITH MAJOR PROBLEMS                                                               | 791         |
| 34                                                                                | 388        | DRG       | PREMATURITY WITHOUT MAJOR PROBLEMS                                                            | 792         |
| 40                                                                                | 389        | DRG       | FULL TERM NEONATE WITH MAJOR PROBLEMS                                                         | 793         |
| EP                                                                                | 390        | DRG       | NEONATE WITH OTHER SIGNIFICANT PROBLEMS                                                       | 794         |
| 40                                                                                | 391        | DRG       | NORMAL NEWBORN                                                                                | 795         |
| <b>Diagnosis-related Groups (DRG) Codes Version 25 (effective as of 1/1/2007)</b> |            |           |                                                                                               | X Ref, v 24 |
| EP                                                                                | <b>765</b> | DRG       | CESAREAN SECTION W CC/MCC                                                                     | 370         |
| EP                                                                                | <b>766</b> | DRG       | CESAREAN SECTION W/O CC/MCC                                                                   | 371         |
| EP                                                                                | <b>767</b> | DRG       | VAGINAL DELIVERY W STERILIZATION &/OR D&C                                                     | 374         |
| EP                                                                                | <b>768</b> | DRG       | VAGINAL DELIVERY W O.R. PROC EXCEPT STERIL &/OR D&C                                           | 375         |
| BLK                                                                               | <b>769</b> | DRG       | POSTPARTUM & POST ABORTION DIAGNOSES W O.R. PROCEDURE                                         | 377         |
| 8                                                                                 | <b>770</b> | DRG       | ABORTION W D&C, ASPIRATION CURETTAGE OR HYSTEROTOMY                                           | 381         |
| EP                                                                                | <b>774</b> | DRG       | VAGINAL DELIVERY W COMPLICATING DIAGNOSES                                                     | 372         |
| EP                                                                                | <b>775</b> | DRG       | VAGINAL DELIVERY W/O COMPLICATING DIAGNOSES                                                   | 373         |
| BLK                                                                               | <b>776</b> | DRG       | POSTPARTUM & POST ABORTION DIAGNOSES W/O O.R. PROCEDURE                                       | 376         |
| 8                                                                                 | <b>777</b> | DRG       | ECTOPIC PREGNANCY                                                                             | 378         |
| BLK                                                                               | <b>778</b> | DRG       | THREATENED ABORTION                                                                           | 379         |
| 8                                                                                 | <b>779</b> | DRG       | ABORTION W/O D&C                                                                              | 380         |
| BLK                                                                               | <b>780</b> | DRG       | FALSE LABOR                                                                                   | 382         |
| BLK                                                                               | <b>781</b> | DRG       | OTHER ANTEPARTUM DIAGNOSES W MEDICAL COMPLICATIONS                                            | 383         |



Appendix A  
Pregnancy-Related Insurance Claims Codes

| Gestational Age (weeks) at Pregnancy Outcome† | Code       | Code Type | Description                                                  |     |
|-----------------------------------------------|------------|-----------|--------------------------------------------------------------|-----|
| BLK                                           | <b>782</b> | DRG       | OTHER ANTEPARTUM DIAGNOSES W/O MEDICAL COMPLICATIONS         | 384 |
| BLK                                           | <b>789</b> | DRG       | NEONATES, DIED OR TRANSFERRED TO ANOTHER ACUTE CARE FACILITY | 385 |
| 32                                            | <b>790</b> | DRG       | EXTREME IMMATURETY OR RESPIRATORY DISTRESS SYNDROME, NEONATE | 386 |
| 34                                            | <b>791</b> | DRG       | PREMATURITY W MAJOR PROBLEMS                                 | 387 |
| 34                                            | <b>792</b> | DRG       | PREMATURITY W/O MAJOR PROBLEMS                               | 388 |
| 40                                            | <b>793</b> | DRG       | FULL TERM NEONATE W MAJOR PROBLEMS                           | 389 |
| EP                                            | <b>794</b> | DRG       | NEONATE W OTHER SIGNIFICANT PROBLEMS                         | 390 |
| 40                                            | <b>795</b> | DRG       | NORMAL NEWBORN                                               | 391 |

† Pregnancy Outcome Codes

40 = Codes that indicate a full term birth.

xx = Codes that indicate less than a full term birth, where "xx" is the number of weeks of gestation at termination based on Hornbrook (17) (e.g., ectopic pregnancy = 8 weeks, stillbirth = 28 weeks, preterm live birth = 34 weeks, etc.).

PT = Pre-Term- for codes indicating termination of pregnancy prior to full term, but unable to estimate when.

EP = End of Pregnancy- for codes indicating termination of pregnancy but unable to determine if full term or earlier.

BLK = blank, otherwise (i.e., does not help identify end of pregnancy).
