# Supplementary material
Source: PubMed Central journal article supplement (PMC3675839)
Supplement: Supp_Table2.pdf [file Supp_Table2.pdf]

SUPPLEMENTARY TABLE S2. CONGENITAL ANOMALIES

| <i>ICD-9 code</i>                 | <i>Description</i>                                     |
|-----------------------------------|--------------------------------------------------------|
| 740                               | Anencephalus and similar anomalies                     |
| 741                               | Spina bifida                                           |
| 742                               | Other congenital anomalies of the nervous system       |
| 743                               | Congenital anomalies of the eye                        |
| 744                               | Congenital anomalies of the ear, face, and neck        |
| 745–745.3; 746–747.49             | Complex congenital heart disease                       |
| 745.4–745.9                       | Atrial septal defect/ventricular septal defect         |
| 747.5–747.9                       | Other congenital anomalies of the circulatory system   |
| 748                               | Choanal atresia                                        |
| 748.1–748.9                       | Congenital anomalies of the respiratory system         |
| 749                               | Cleft palate and cleft lip                             |
| 750–750.2, 750.4–750.9            | Other congenital anomaly of the upper alimentary tract |
| 750.3                             | Tracheoesophageal fistula/esophageal atresia           |
| 751.1–751.2                       | Intestinal atresias                                    |
| 751.0; 751.3–751.9                | Other congenital anomalies of the digestive system     |
| 752                               | Congenital anomalies of the genital organs             |
| 753                               | Congenital anomalies of the urinary system             |
| 754                               | Certain congenital musculoskeletal deformities         |
| 755                               | Polydactyly                                            |
| 755.1; 755.5–755.9                | Other congenital anomalies of the limbs                |
| 755.2–755.4                       | Reduct deform upper limb or lower limbs                |
| 756–756.5; 756.71;<br>756.8–756.9 | Other congenital musculoskeletal anomalies             |
| 756.6                             | Anomalies of the diaphragm                             |
| 756.70; 756.72–756.79             | Congenital anomalies of the abdominal wall             |
| 757                               | Congenital anomalies of the integument                 |
| 759                               | Other and unspecified congenital anomalies             |

*Source:* International Classification of Diseases, Ninth Revision, Clinical Modification (19).
